# Supplementary material for: Long-Term Pancreatic Beta Cell Exposure to High Levels of Glucose but Not Palmitate Induces DNA Methylation within the Insulin Gene Promoter and Represses Transcriptional Activity
Source: PubMed Central journal article supplement (PMC4319953; doi:10.1371/journal.pone.0115350), 2015-02-06
Supplement: pone.0115350.s005.pdf [file pone.0115350.s005.pdf]

**Table S1 Sequences of real-time PCR primer sets.**

| <b>Gene<br/>(Gene ID)</b>            | <b>Forward Primer</b>            | <b>Reverse Primer</b>              |
|--------------------------------------|----------------------------------|------------------------------------|
| Rat <i>Ins1</i><br>(24505)           | 5' -GTGGGAACGTGGTTTCTT- 3'       | 5' -GCAGTAGTTCTCCAGTTGGTAGAGG - 3' |
| Rat <i>Irs2</i><br>(29376)           | 5' -CCCCAGTGTCCTCCATCCT- 3'      | 5' -TTTCCTGAGAGAGACGTTTTCCA- 3'    |
| Rat <i>Dnmt1</i><br>(84350)          | 5' -CGGCTCAAAGACTTGAAAAG- 3'     | 5' -TAGCCAGGTAGCCTTCCTCA- 3'       |
| Rat <i>Dnmt3a</i><br>(444984)        | 5' -CCGGTGCTATCTCTTTTG - 3'      | 5' -TGACGATGGAGAGGTCATTG- 3'       |
| Rat <i>Dnmt3b</i><br>(444985)        | 5' -TAGGGTCCTGTCCCTGTTTG- 3'     | 5' -GTGATTTCCGGACGTCATT- 3'        |
| Rat <i>Tet1</i><br>(309902)          | 5' -GAAACCCTGAATTGGCAAAA- 3'     | 5' -GGGTGAGCTTTCTGATCGAC- 3'       |
| Rat <i>Tet2</i><br>(310859)          | 5' -CCCTCACTAGAGAAGACAATCGAG- 3' | 5' -GATCCACTAACCTCCTGACTCTTC- 3'   |
| Rat <i>Tet3</i><br>(680576)          | 5' -GAGAAGCTAAGCACACCAGAGAAG- 3' | 5' -CTGCTCATACTGTAGGGGTCAGAG- 3'   |
| Rat <i>Bip</i><br>(25617)            | 5' -CCTGTTGCTGGACTCTGTGA- 3'     | 5' -GAATACACCGACGCAGGAAT- 3'       |
| Rat <i>spliced Xbp-1</i><br>(289754) | 5' -CTGAGTCCGAATCAGGTGCAG- 3'    | 5' -ATCCATGGGAAGATGTTCTGG- 3'      |
| Rat <i>Pi3k p85</i><br>(25513)       | 5' -GAGAGGAAGACATCGACCTACACT- 3' | 5' -CCTCTCCCCAGTAGTTTCATTG- 3'     |
