# Supplementary material for: Long-Term Pancreatic Beta Cell Exposure to High Levels of Glucose but Not Palmitate Induces DNA Methylation within the Insulin Gene Promoter and Represses Transcriptional Activity
Source: PubMed Central journal article supplement (PMC4319953; doi:10.1371/journal.pone.0115350), 2015-02-06
Supplement: pone.0115350.s007.pdf [file pone.0115350.s007.pdf]

**Table S3 Sequences of bisulfite sequencing PCR primer set.**

| <b><u>Gene</u></b>   | <b><u>Forward</u></b>           | <b><u>Reverse</u></b>          | <b><u>Condition</u></b> |
|----------------------|---------------------------------|--------------------------------|-------------------------|
| <i>Ins1</i> promoter | 5' -GAGTTGGGGTTTTAGTTGAGTT - 3' | 5' -AAAAAAAAAACCCACATCCTT - 3' | 55°C (40)               |

Number in parentheses indicates cycles at the indicated temperature.
